# Supplementary material for: Identification and external validation of the hub genes associated with cardiorenal syndrome through time-series and network analyses
Source: publisher site journal article supplement (doi:10.18632/aging.203878), 2022-02-08
Supplement: Supplementary file [file aging-v14i3-203878-supplementary-material-SD2.pdf]

**SUPPLEMENTARY FIGURE**

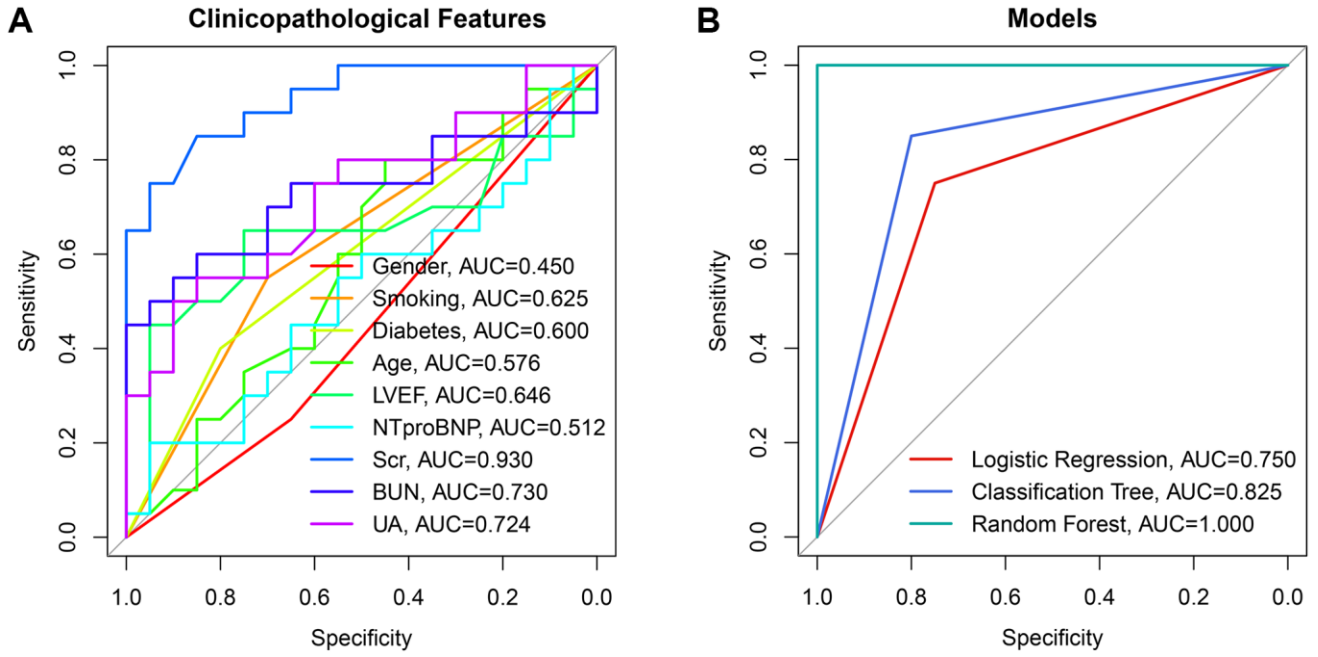

**Supplementary Figure 1.** The diagnosis ability of the clinicopathological parameters (A) and the established models (B).
