# Supplementary material for: Identification and external validation of the hub genes associated with cardiorenal syndrome through time-series and network analyses
Source: publisher site journal article supplement (doi:10.18632/aging.203878), 2022-02-08
Supplement: Supplementary file [file aging-v14i3-203878-supplementary-material-SD3.pdf]

## SUPPLEMENTARY TABLES

**Supplementary Table 1. The PPI network analysis via CytoHubba.**

| Node_name | MCC | DMNC    | MNC | Degree | EPC   | Bottle Neck | EcCentricity | Closeness | Radiality | Betweenness | Stress | Clustering Coefficient |
|-----------|-----|---------|-----|--------|-------|-------------|--------------|-----------|-----------|-------------|--------|------------------------|
| Kif22     | 6   | 0.46346 | 3   | 3      | 2.349 | 1           | 0.125        | 3.5       | 0.625     | 0           | 0      | 1                      |
| Pi16      | 1   | 0       | 1   | 1      | 2.559 | 1           | 0.25         | 6         | 1.28571   | 0           | 0      | 0                      |
| FN1       | 314 | 0.47886 | 10  | 10     | 8.878 | 7           | 0.25         | 11.83333  | 2.19643   | 15.56667    | 42     | 0.53333                |
| POSTN     | 318 | 0.49882 | 10  | 10     | 8.793 | 3           | 0.375        | 12        | 2.25      | 18.23333    | 54     | 0.55556                |
| Plod2     | 6   | 0.46346 | 3   | 3      | 5.435 | 1           | 0.375        | 8.5       | 1.875     | 0           | 0      | 1                      |
| Timp1     | 288 | 0.58315 | 8   | 8      | 8.423 | 1           | 0.25         | 10.83333  | 2.08929   | 3.9         | 16     | 0.71429                |
| Lox1l     | 168 | 0.5854  | 7   | 7      | 8.365 | 1           | 0.25         | 10.33333  | 2.03571   | 2.66667     | 10     | 0.7619                 |
| Tnfrsf11b | 2   | 0.30779 | 2   | 2      | 4.927 | 1           | 0.25         | 7.83333   | 1.76786   | 0           | 0      | 1                      |
| Vcan      | 120 | 0.64826 | 5   | 5      | 7.536 | 1           | 0.25         | 9.33333   | 1.92857   | 0           | 0      | 1                      |
| Thy1      | 24  | 0.56839 | 4   | 4      | 6.887 | 1           | 0.25         | 8.83333   | 1.875     | 0           | 0      | 1                      |
| Col8a1    | 13  | 0.47366 | 4   | 5      | 6.563 | 2           | 0.375        | 9.5       | 1.98214   | 26.66667    | 54     | 0.5                    |
| Mmp14     | 24  | 0.56839 | 4   | 4      | 6.898 | 1           | 0.25         | 8.83333   | 1.875     | 0           | 0      | 1                      |
| Ltbp2     | 24  | 0.56839 | 4   | 4      | 6.919 | 1           | 0.25         | 8.83333   | 1.875     | 0           | 0      | 1                      |
| Col3a1    | 300 | 0.47886 | 10  | 10     | 8.711 | 3           | 0.375        | 12        | 2.25      | 19.73333    | 54     | 0.53333                |
| Fstl1     | 24  | 0.56839 | 4   | 4      | 6.665 | 1           | 0.25         | 8.83333   | 1.875     | 0           | 0      | 1                      |
| Col1a1    | 350 | 0.39597 | 13  | 13     | 9.283 | 2           | 0.375        | 13.5      | 2.41071   | 51.23333    | 112    | 0.39744                |
| Prc1      | 12  | 0.47366 | 4   | 4      | 2.521 | 1           | 0.25         | 4         | 0.6875    | 0.66667     | 2      | 0.83333                |
| Top2a     | 12  | 0.47366 | 4   | 4      | 2.523 | 1           | 0.25         | 4         | 0.6875    | 0.66667     | 2      | 0.83333                |
| Racgap1   | 12  | 0.47366 | 4   | 4      | 2.59  | 1           | 0.25         | 4         | 0.6875    | 0.66667     | 2      | 0.83333                |
| Cdkn3     | 6   | 0.46346 | 3   | 3      | 2.321 | 1           | 0.125        | 3.5       | 0.625     | 0           | 0      | 1                      |

**Supplementary Table 2. The raw data of the RF-qPCR experiments.**

| ID      | Group | CT(FN1)  | CT(POSTN) | CT(GAPDH) |
|---------|-------|----------|-----------|-----------|
| 2021016 | CRS   | 22.714   | 21.62269  | 17.47264  |
| 2021035 | CRS   | 21.62767 | 23.80968  | 17.20525  |
| 2021044 | CRS   | 21.07704 | 22.63808  | 17.18994  |
| 2021045 | CRS   | 21.36649 | 23.64455  | 16.87597  |
| 2021061 | CRS   | 21.78654 | 22.12539  | 17.33394  |
| 2021072 | CRS   | 19.53786 | 23.48876  | 16.93788  |
| 2021075 | CRS   | 21.59798 | 22.45887  | 17.65224  |
| 2021079 | CRS   | 20.83566 | 23.42787  | 16.70008  |
| 2021084 | CRS   | 20.00147 | 23.39505  | 18.47383  |
| 2021087 | CRS   | 21.25389 | 22.97611  | 18.36617  |
| 2021088 | CRS   | 21.53118 | 23.40699  | 16.77462  |
| 2021096 | CRS   | 18.06519 | 24.10553  | 16.60071  |
| 2021097 | CRS   | 22.15883 | 23.26074  | 17.02379  |
| 2021112 | CRS   | 21.6212  | 24.72875  | 18.31842  |
| 2021119 | CRS   | 21.28442 | 21.61209  | 16.47575  |
| 2021131 | CRS   | 20.43167 | 23.94418  | 18.85962  |

|         |         |          |          |          |
|---------|---------|----------|----------|----------|
| 2021145 | CRS     | 21.78432 | 23.92037 | 17.80561 |
| 2021157 | CRS     | 20.9538  | 22.39475 | 18.02395 |
| 2021159 | CRS     | 21.75587 | 22.55037 | 17.49426 |
| 2021165 | CRS     | 21.72398 | 22.82194 | 17.40736 |
| 2021003 | Control | 22.04717 | 24.19026 | 13.92721 |
| 2021008 | Control | 22.29514 | 23.86475 | 16.58527 |
| 2021013 | Control | 22.21988 | 22.81359 | 15.47096 |
| 2021015 | Control | 22.8975  | 23.48162 | 16.10068 |
| 2021017 | Control | 22.17563 | 23.79683 | 15.873   |
| 2021021 | Control | 22.32354 | 23.76648 | 17.50554 |
| 2021022 | Control | 21.82626 | 23.32713 | 16.35305 |
| 2021026 | Control | 22.69801 | 22.79801 | 17.94128 |
| 2021029 | Control | 21.21703 | 23.83898 | 17.70134 |
| 2021031 | Control | 22.15845 | 24.01224 | 16.21806 |
| 2021032 | Control | 20.26998 | 21.77754 | 16.41206 |
| 2021034 | Control | 22.57254 | 23.01443 | 15.82979 |
| 2021036 | Control | 22.10823 | 25.4372  | 18.03494 |
| 2021038 | Control | 19.83442 | 24.09309 | 16.93175 |
| 2021039 | Control | 22.8405  | 23.61109 | 17.03301 |
| 2021040 | Control | 20.72439 | 24.23108 | 16.52985 |
| 2021041 | Control | 22.49104 | 22.74978 | 16.83147 |
| 2021042 | Control | 22.12857 | 23.5926  | 16.46831 |
| 2021046 | Control | 23.01731 | 22.66537 | 17.41212 |
| 2021047 | Control | 22.55935 | 22.80843 | 18.6565  |

---
